# Supplementary material
Source: MDPI journal article supplement (https://www.mdpi.com/2075-163X/12/11/1460)

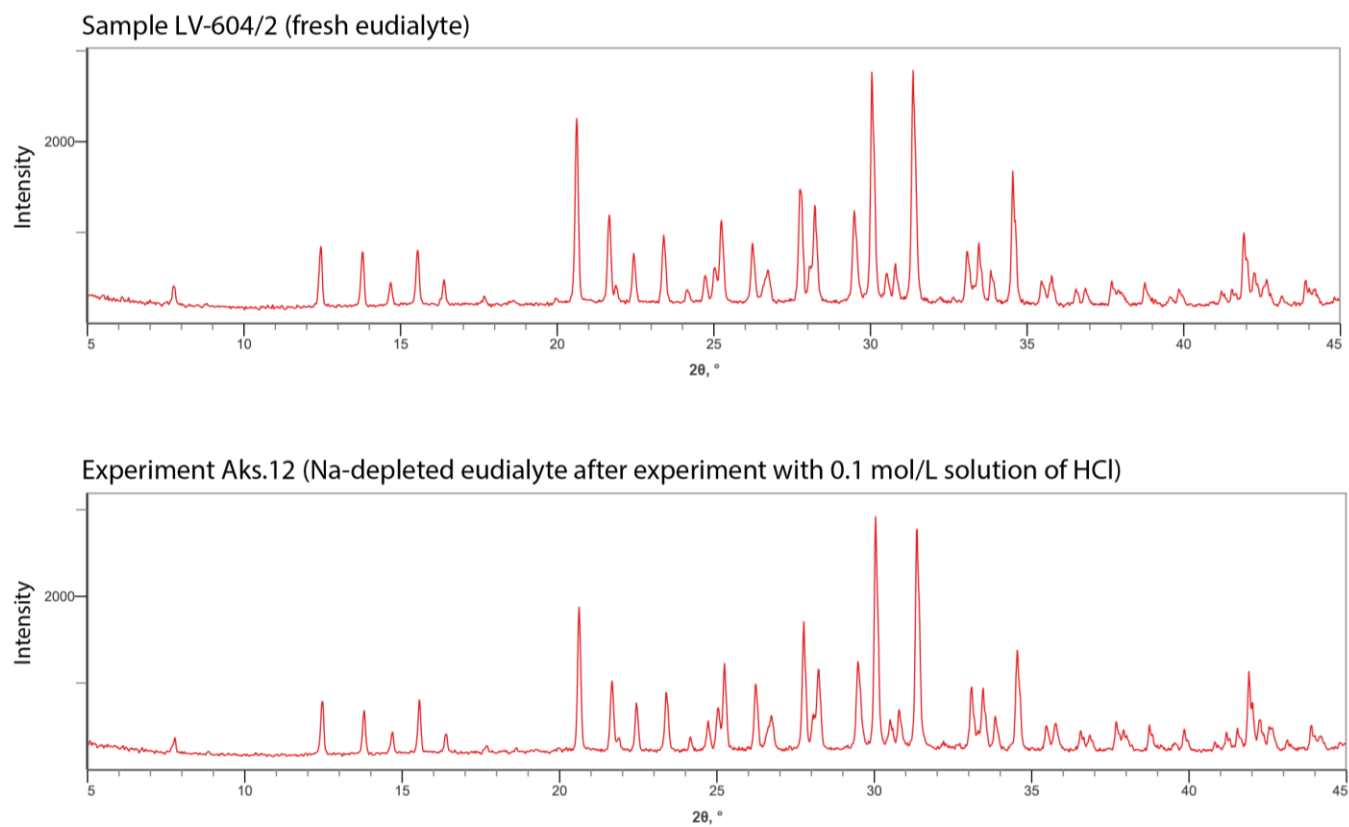

**Figure S1.** X-ray data; Powder X-ray diffraction data.

Supplement: s1 [file s1 › minerals-2001586-supplementary.pdf]
